# Supplementary material for: Topical Application of Antrodia cinnamomea Ointment in Diabetic Wound Healing
Source: MDPI journal article supplement (doi:10.3390/life12040507), 2022-03-30
Supplement: s1 [file s1]

### Supplementary Materials

$5 \times 10^4$  RAW264.7 cells were treated with medium alone, 0.1% DMSO/0.001% ethanol (vehicle), LPS (0.1  $\mu\text{g/mL}$ ), LPS (0.1  $\mu\text{g/mL}$ ) plus IFN- $\gamma$  (5U), or various doses of AC extracts (50, 100, 200, 400, 800  $\mu\text{g/mL}$ ) as indicated. Culture supernatants were collected after 24 h. The amounts of nitrite were measured by Griess assay. Data are expressed as mean of nitrite ( $\mu\text{M}$ )  $\pm$  SD of four independent experiments.

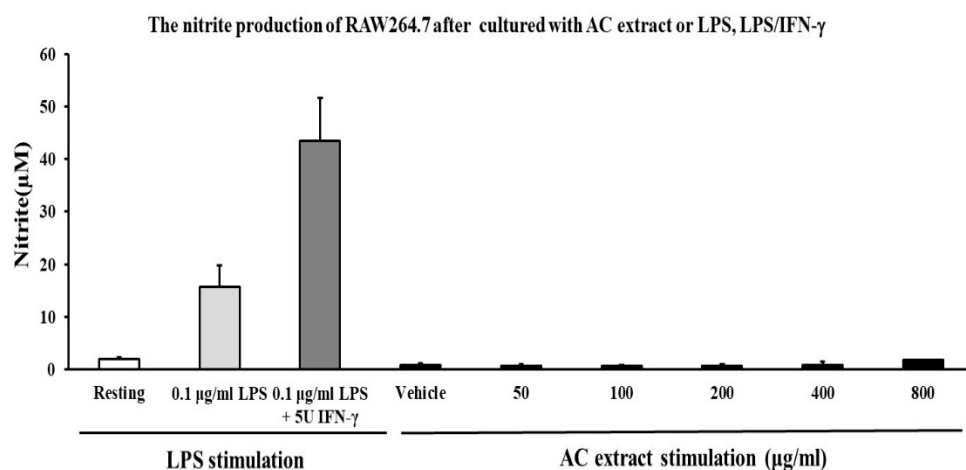

**Figure S1.** Addition of the AC extract alone did not activate macrophages.

$5 \times 10^4$  RAW264.7 cells were treated with 0.1% DMSO/0.001% ethanol (vehicle) or various doses of AC extracts (50, 100, 200, 400, 800  $\mu\text{g/mL}$ ) as indicated. After 24 h incubation, the proliferation of RAW264.7 cells was measured by MTT assay. Data are expressed as mean of OD<sub>570 nm</sub>  $\pm$  SD of four independent experiments.

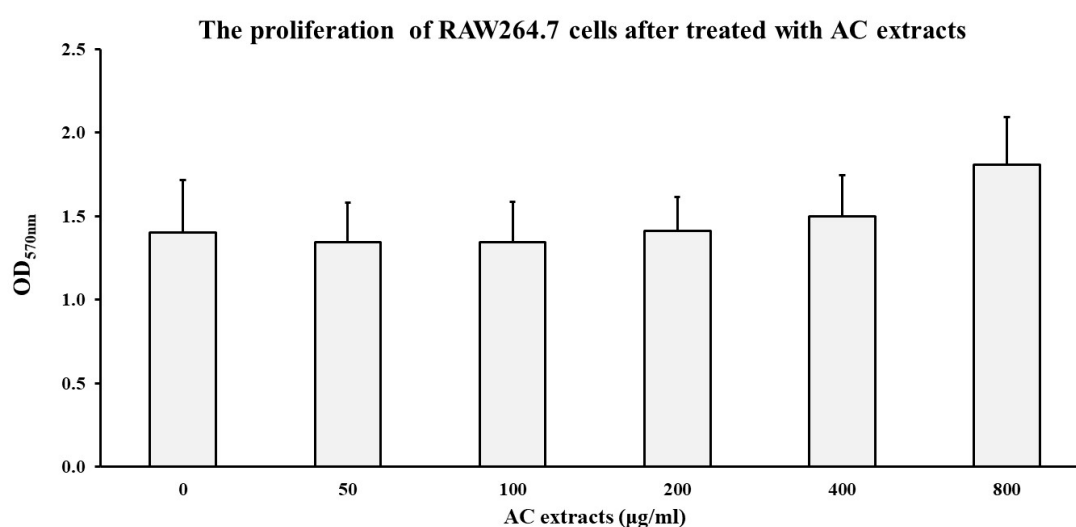

**Figure S2.** The effect of AC extracts on the proliferation of RAW 264.7 cell

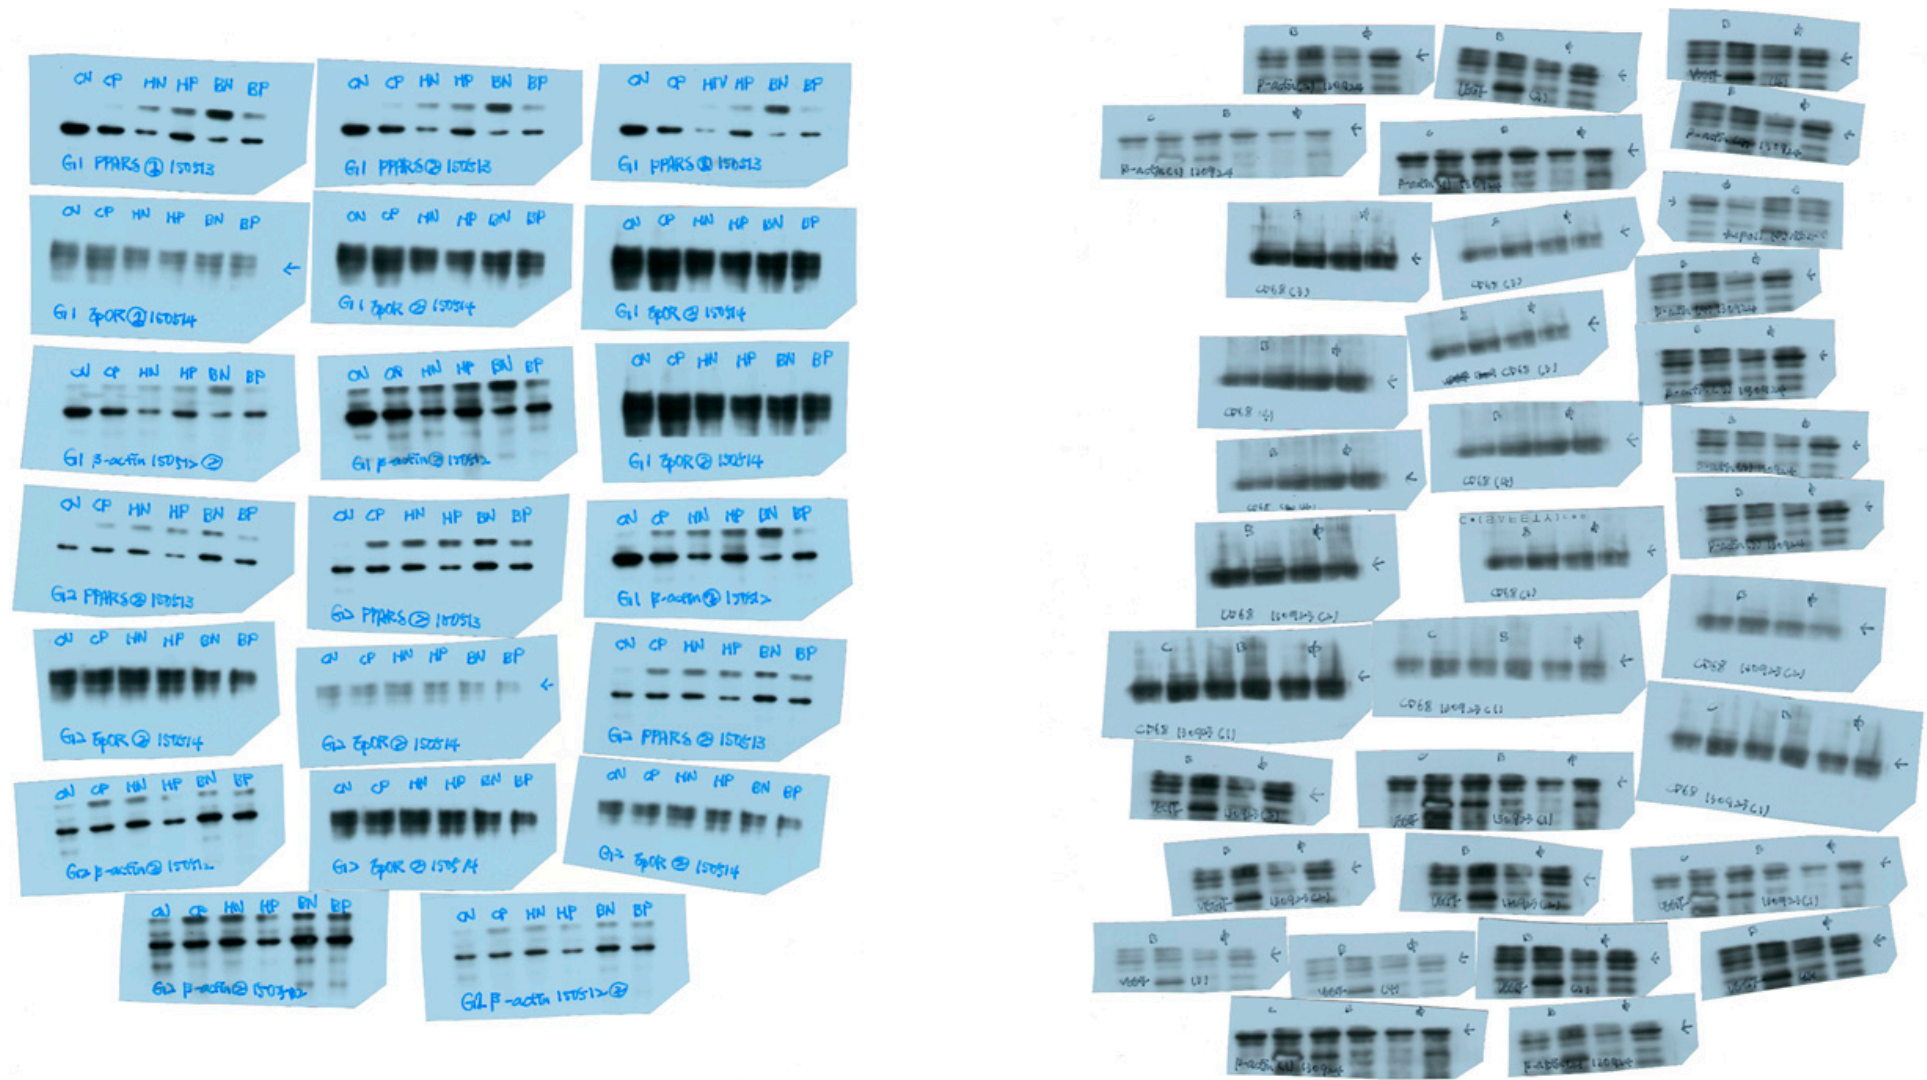

Figure S3. The original Western blot figures.
